# Supplementary material for: Laboratory Performance Evaluation of a Low-Cost Electrochemical Formaldehyde Sensor
Source: MDPI journal article supplement (doi:10.3390/s23177444), 2023-08-26
Supplement: s1 [file s1]

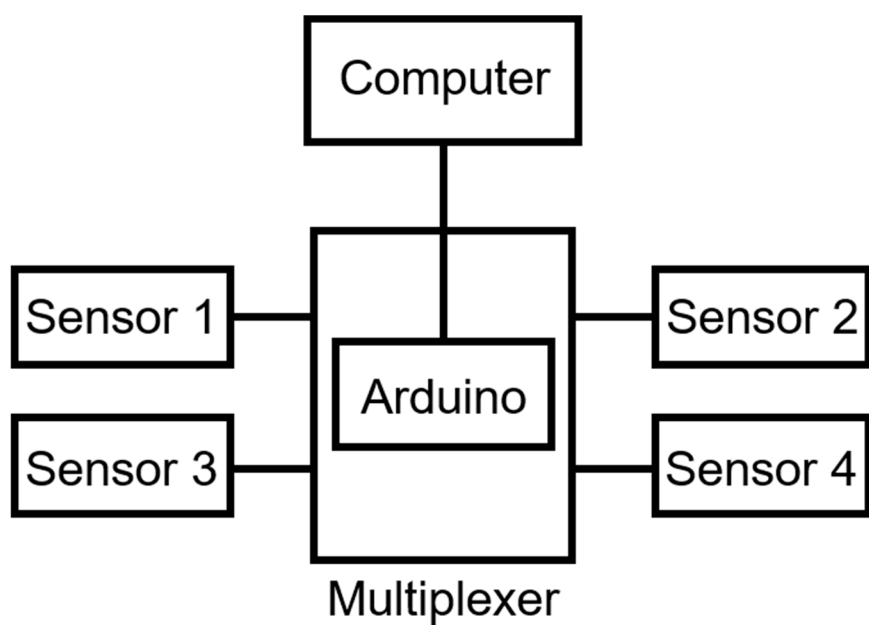

Figure S1. Sensor connections. Each sensor was placed in a closed 3D-printed PLA chamber.

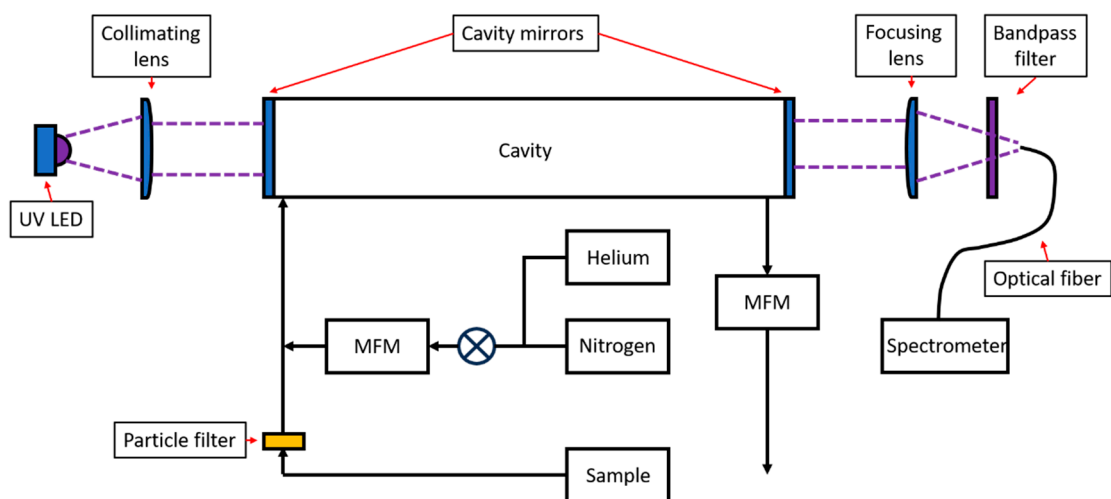

Figure S2. Schematic of the broadband cavity enhanced absorption spectrometer (BBCEAS) for formaldehyde measurement. Sample gas flows into the system and gas flow rate is measured by mass flow meters (MFM).

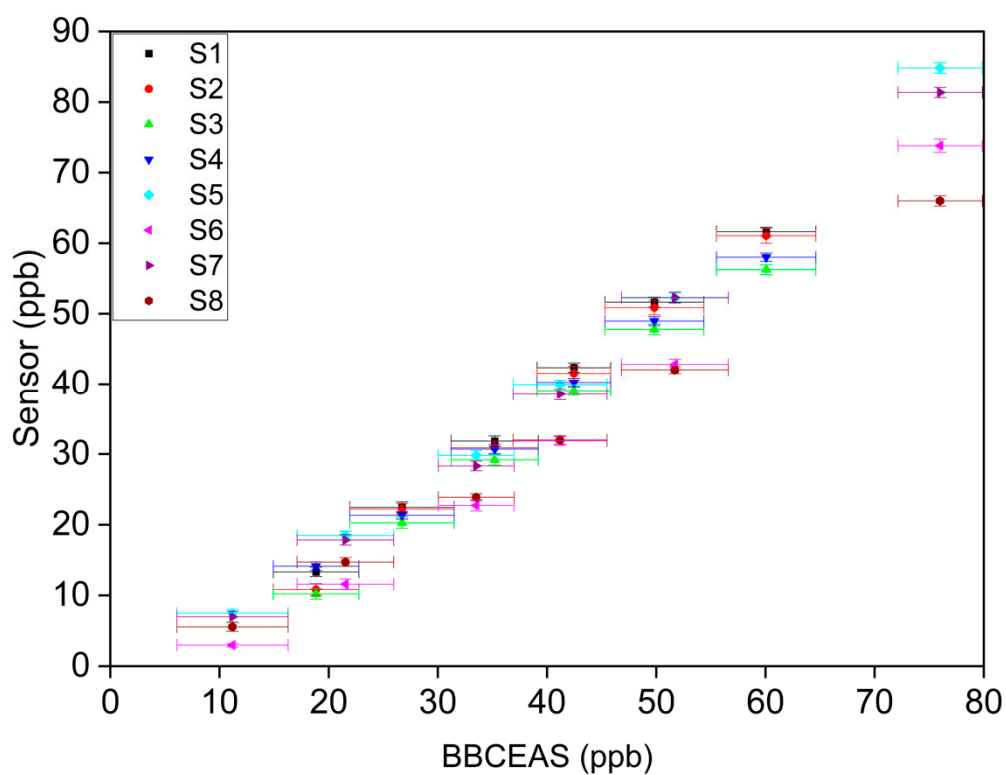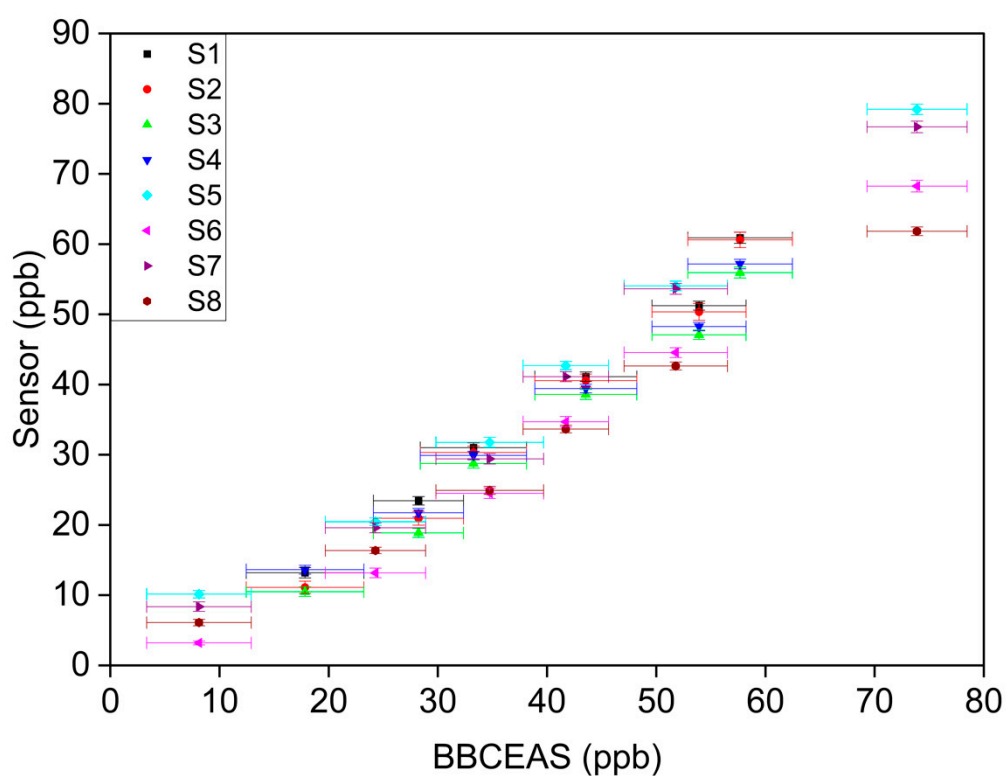

Figure S3. Response of eight sensors vs. the BBCEAS in the repeated concentration-only tests.

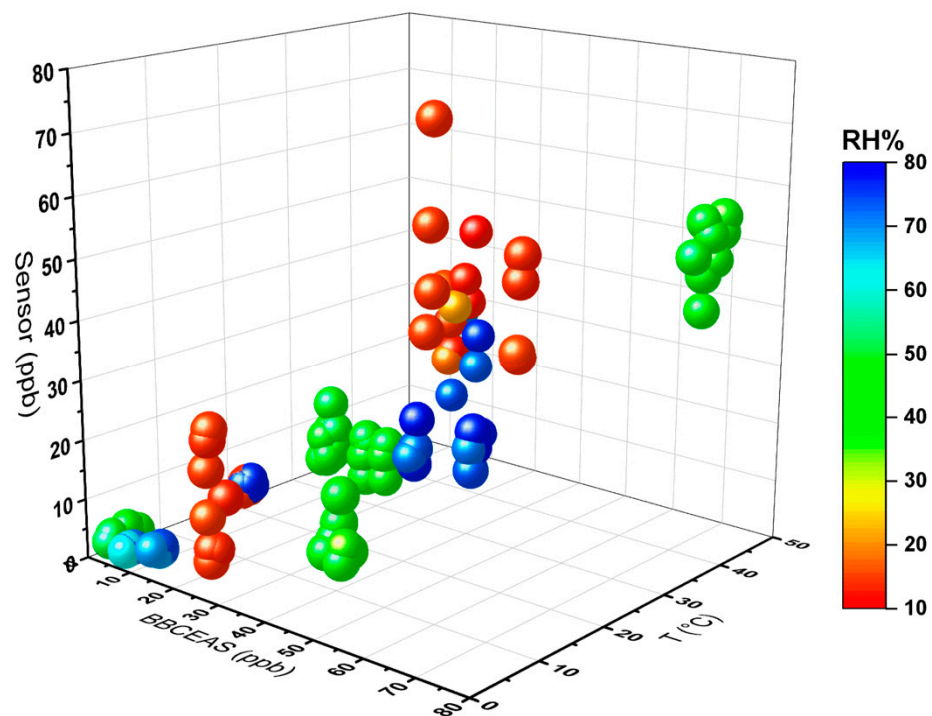

Figure S4. Sensor response vs. formaldehyde concentration, temperature, and RH. Experimental conditions selected by a Box-Behnken design. Note that this figure showed actual testing conditions.

Table S1. Actual conditions of the Box-Behnken experimental design

| Sensor # | Formaldehyde concentration (ppb) | Temperature (°C) | Relative humidity (%) |
|----------|----------------------------------|------------------|-----------------------|
| S1       | 22.4±2.8                         | 3.83±0.01        | 14.39±0.01            |
| S1       | 26.6±3.5                         | 38.24±0.03       | 22.19±2.20            |
| S1       | 5.8±3.3                          | 2.43±0.04        | 64.02±0.19            |
| S1       | 21.6±6                           | 41.02±0.04       | 75.68±0.01            |
| S1       | 0.1±1.1                          | 5.69±0.02        | 38.32±0.04            |
| S1       | 2.6±3.1                          | 39.86±0.26       | 42.86±0.33            |
| S1       | 50.8±3.1                         | 3.93±0.02        | 38.18±0.01            |
| S1       | 75.0±7.1                         | 40.97±0.02       | 46.32±0.03            |
| S1       | 0.0±1.1                          | 22.15±0.02       | 14.54±0.03            |
| S1       | 0.1±1.3                          | 22.31±0.03       | 75.71±0.25            |
| S1       | 42.3±3.4                         | 21.85±0.02       | 14.28±0.03            |
| S1       | 39.2±3.8                         | 21.66±0.01       | 72.30±0.05            |
| S1       | 19.9±3.6                         | 21.98±0.02       | 43.57±0.04            |
| S1       | 21.1±3.3                         | 21.80±0.03       | 45.26±0.14            |
| S1       | 19.8±3.2                         | 21.77±0.02       | 46.06±0.05            |
| S2       | 22.4±2.8                         | 3.46±0.02        | 15.00±0.01            |
| S2       | 26.6±3.5                         | 39.87±0.02       | 12.68±1.14            |
| S2       | 5.8±3.3                          | 2.92±0.04        | 71.04±0.15            |
| S2       | 21.6±6                           | 41.47±0.06       | 74.01±0.01            |
| S2       | 0.1±1.1                          | 4.81±0.02        | 45.45±0.06            |
| S2       | 2.6±3.1                          | 39.70±0.30       | 42.16±0.18            |
| S2       | 50.8±3.1                         | 3.42±0.02        | 46.13±0.02            |
| S2       | 75.0±7.1                         | 41.76±0.02       | 41.22±0.02            |
| S2       | 0.0±1.1                          | 22.76±0.02       | 14.45±0.03            |
| S2       | 0.1±1.3                          | 22.84±0.02       | 77.26±0.09            |
| S2       | 42.3±3.4                         | 22.45±0.02       | 14.50±0.02            |
| S2       | 39.2±3.8                         | 22.28±0.01       | 77.08±0.04            |
| S2       | 19.9±3.6                         | 22.57±0.01       | 46.95±0.02            |
| S2       | 21.1±3.3                         | 22.40±0.04       | 48.16±0.11            |
| S2       | 19.8±3.2                         | 22.37±0.02       | 48.57±0.07            |
| S3       | 22.4±2.8                         | 3.36±0.02        | 14.38±0.01            |
| S3       | 26.6±3.5                         | 41.69±0.01       | 10.95±0.02            |
| S3       | 5.8±3.3                          | 2.10±0.03        | 71.65±0.30            |
| S3       | 21.6±6                           | 43.42±0.05       | 71.10±0.03            |
| S3       | 0.1±1.1                          | 2.89±0.01        | 50.75±0.04            |
| S3       | 2.6±3.1                          | 40.87±0.34       | 42.80±0.15            |
| S3       | 50.8±3.1                         | 3.42±0.01        | 45.28±0.01            |
| S3       | 75.0±7.1                         | 43.19±0.01       | 41.02±0.12            |
| S3       | 0.0±1.1                          | 23.26±0.02       | 14.31±0.03            |
| S3       | 0.1±1.3                          | 23.41±0.03       | 76.78±0.09            |
| S3       | 42.3±3.4                         | 22.95±0.02       | 14.55±0.01            |
| S3       | 39.2±3.8                         | 22.73±0.02       | 78.17±0.04            |
| S3       | 19.9±3.6                         | 23.06±0.01       | 47.66±0.02            |
| S3       | 21.1±3.3                         | 22.91±0.04       | 48.72±0.10            |
| S3       | 19.8±3.2                         | 22.88±0.02       | 49.03±0.07            |
| S4       | 22.4±2.8                         | 3.93±0.01        | 13.93±0.01            |
| S4       | 26.6±3.5                         | 40.61±0.02       | 12.06±1.04            |
| S4       | 5.8±3.3                          | 1.84±0.03        | 61.73±0.36            |
| S4       | 21.6±6                           | 43.20±0.06       | 70.16±0.04            |
| S4       | 0.1±1.1                          | 4.31±0.04        | 40.42±0.05            |

|    |          |            |            |
|----|----------|------------|------------|
| S4 | 2.6±3.1  | 41.12±0.34 | 45.10±0.19 |
| S4 | 50.8±3.1 | 4.28±0.02  | 36.45±0.01 |
| S4 | 75.0±7.1 | 42.90±0.03 | 43.46±0.03 |
| S4 | 0.0±1.1  | 23.07±0.03 | 14.01±0.04 |
| S4 | 0.1±1.3  | 23.25±0.03 | 75.93±0.08 |
| S4 | 42.3±3.4 | 22.70±0.02 | 14.23±0.03 |
| S4 | 39.2±3.8 | 22.46±0.01 | 73.46±0.04 |
| S4 | 19.9±3.6 | 22.86±0.02 | 44.50±0.03 |
| S4 | 21.1±3.3 | 22.70±0.03 | 45.84±0.11 |
| S4 | 19.8±3.2 | 22.66±0.02 | 46.45±0.06 |
| S5 | 23.0±3.0 | 3.55±0.01  | 14.17±0.01 |
| S5 | 23.2±3.4 | 40.04±0.08 | 14.70±0.66 |
| S5 | 10.8±3.0 | 3.82±0.01  | 73.83±0.33 |
| S5 | 28.2±5.8 | 40.97±0.02 | 77.10±0.06 |
| S5 | 0.0±1.1  | 5.37±0.02  | 44.88±0.05 |
| S5 | 2.6±3.1  | 40.09±0.13 | 44.37±0.41 |
| S5 | 47.5±3.1 | 5.41±0.02  | 44.91±0.28 |
| S5 | 73.7±4.6 | 40.96±0.04 | 45.26±0.51 |
| S5 | 0.0±2.3  | 22.78±0.01 | 13.65±0.03 |
| S5 | 0.8±7.0  | 23.05±0.02 | 77.15±0.03 |
| S5 | 59.3±4.4 | 23.21±0.01 | 13.95±0.36 |
| S5 | 50.6±3.4 | 22.90±0.02 | 77.64±0.05 |
| S5 | 27.5±4.3 | 23.25±0.01 | 46.45±0.07 |
| S5 | 28.0±4.3 | 23.25±0.01 | 47.20±0.02 |
| S5 | 32.0±4.5 | 23.26±0.01 | 46.13±0.02 |
| S6 | 23.0±3.0 | 4.26±0.01  | 13.53±0.02 |
| S6 | 23.2±3.4 | 39.65±0.08 | 18.23±0.71 |
| S6 | 10.8±3.0 | 3.62±0.03  | 68.08±0.43 |
| S6 | 28.2±5.8 | 40.57±0.02 | 75.91±0.04 |
| S6 | 0.0±1.1  | 6.77±0.01  | 39.07±0.04 |
| S6 | 2.6±3.1  | 40.34±0.13 | 43.35±0.44 |
| S6 | 47.5±3.1 | 6.84±0.02  | 37.35±0.46 |
| S6 | 73.7±4.6 | 40.92±0.04 | 44.98±0.58 |
| S6 | 0.0±2.3  | 22.50±0.02 | 13.43±0.05 |
| S6 | 0.8±7.0  | 22.78±0.02 | 76.71±0.03 |
| S6 | 59.3±4.4 | 22.92±0.01 | 14.22±0.09 |
| S6 | 50.6±3.4 | 22.60±0.02 | 73.88±0.07 |
| S6 | 27.5±4.3 | 22.96±0.01 | 43.87±0.30 |
| S6 | 28.0±4.3 | 22.96±0.01 | 44.73±0.02 |
| S6 | 32.0±4.5 | 22.98±0.01 | 43.84±0.02 |
| S7 | 23.0±3.0 | 5.61±0.01  | 13.09±0.02 |
| S7 | 23.2±3.4 | 39.00±0.08 | 16.05±0.76 |
| S7 | 10.8±3.0 | 2.68±0.02  | 68.44±0.39 |
| S7 | 28.2±5.8 | 40.55±0.02 | 72.61±0.06 |
| S7 | 0.0±1.1  | 3.36±0.01  | 49.23±0.02 |
| S7 | 2.6±3.1  | 39.46±0.12 | 45.45±0.43 |
| S7 | 47.5±3.1 | 3.53±0.02  | 45.80±0.63 |
| S7 | 73.7±4.6 | 39.21±0.06 | 48.35±0.37 |
| S7 | 0.0±2.3  | 22.40±0.02 | 13.41±0.04 |
| S7 | 0.8±7.0  | 22.64±0.02 | 76.64±0.02 |
| S7 | 59.3±4.4 | 22.79±0.02 | 15.07±0.24 |
| S7 | 50.6±3.4 | 22.45±0.01 | 71.28±0.07 |
| S7 | 27.5±4.3 | 22.88±0.01 | 43.00±0.30 |

|    |          |            |            |
|----|----------|------------|------------|
| S7 | 28.0±4.3 | 22.88±0.02 | 43.86±0.01 |
| S7 | 32.0±4.5 | 22.90±0.01 | 43.11±0.02 |
| S8 | 23.0±3.0 | 3.29±0.02  | 13.61±0.01 |
| S8 | 23.2±3.4 | 40.44±0.07 | 12.74±0.86 |
| S8 | 10.8±3.0 | 3.88±0.02  | 72.93±0.34 |
| S8 | 28.2±5.8 | 41.54±0.01 | 76.68±0.04 |
| S8 | 0.0±1.1  | 4.63±0.01  | 47.07±0.03 |
| S8 | 2.6±3.1  | 39.84±0.15 | 45.90±0.34 |
| S8 | 47.5±3.1 | 4.72±0.02  | 46.87±0.33 |
| S8 | 73.7±4.6 | 40.97±0.05 | 45.49±0.52 |
| S8 | 0.0±2.3  | 23.04±0.01 | 13.40±0.04 |
| S8 | 0.8±7.0  | 23.29±0.02 | 76.52±0.03 |
| S8 | 59.3±4.4 | 23.46±0.02 | 13.61±0.41 |
| S8 | 50.6±3.4 | 23.10±0.02 | 78.51±0.04 |
| S8 | 27.5±4.3 | 23.54±0.01 | 46.56±0.07 |
| S8 | 28.0±4.3 | 23.54±0.01 | 47.27±0.03 |
| S8 | 32.0±4.5 | 23.55±0.01 | 46.16±0.02 |

Table S2. Evaluation metrics of sensors in the repeated concentration-only tests

| Metrics    | Test# | S1     | S2     | S3     | S4     | S5     | S6     | S7     | S8     |
|------------|-------|--------|--------|--------|--------|--------|--------|--------|--------|
| Slope      | Test1 | 1.21   | 1.24   | 1.13   | 1.08   | 1.06   | 0.95   | 1.21   | 1.01   |
|            | Test2 | 1.20   | 1.23   | 1.14   | 1.10   | 1.19   | 1.10   | 1.16   | 0.93   |
|            | Test3 | 1.15   | 1.19   | 1.11   | 1.06   | 1.09   | 1.02   | 1.08   | 0.87   |
| Intercept  | Test1 | -8.90  | -10.86 | -10.33 | -6.49  | -3.63  | -8.26  | -5.72  | -4.90  |
|            | Test2 | -9.34  | -11.43 | -10.36 | -7.19  | -7.92  | -12.01 | -7.74  | -5.88  |
|            | Test3 | -7.93  | -10.87 | -9.97  | -6.26  | -2.75  | -8.54  | -4.05  | -3.09  |
| $R^2$      | Test1 | 0.986  | 0.990  | 0.991  | 0.984  | 0.994  | 0.994  | 0.995  | 0.995  |
|            | Test2 | 0.997  | 0.997  | 0.995  | 0.997  | 0.995  | 0.993  | 0.996  | 0.998  |
|            | Test3 | 0.989  | 0.986  | 0.986  | 0.987  | 0.987  | 0.989  | 0.987  | 0.993  |
| LOD (ppb)  | Test1 | 6.56   | 5.61   | 5.31   | 7.05   | 6.46   | 6.41   | 5.61   | 5.96   |
|            | Test2 | 2.86   | 3.24   | 3.92   | 3.29   | 5.89   | 7.16   | 5.40   | 3.92   |
|            | Test3 | 5.97   | 6.69   | 6.89   | 6.57   | 9.63   | 8.81   | 9.73   | 6.90   |
| RMSE (ppb) | Test1 | 2.96   | 3.66   | 5.59   | 3.65   | 1.84   | 10.12  | 4.75   | 4.47   |
|            | Test2 | 3.19   | 4.08   | 5.40   | 3.57   | 4.05   | 8.47   | 3.66   | 8.60   |
|            | Test3 | 3.04   | 4.35   | 5.97   | 4.13   | 1.90   | 7.70   | 1.90   | 8.60   |
| NRMSE      | Test1 | 0.0763 | 0.0944 | 0.144  | 0.0942 | 0.0305 | 0.168  | 0.0789 | 0.0743 |
|            | Test2 | 0.0774 | 0.0991 | 0.131  | 0.0866 | 0.0625 | 0.131  | 0.0564 | 0.133  |
|            | Test3 | 0.0764 | 0.109  | 0.150  | 0.104  | 0.0289 | 0.117  | 0.0289 | 0.131  |
| MAE (ppb)  | Test1 | 2.52   | 3.08   | 5.30   | 3.50   | 1.59   | 10.07  | 3.79   | 4.47   |
|            | Test2 | 2.67   | 3.35   | 5.06   | 3.29   | 3.29   | 8.22   | 3.11   | 8.49   |
|            | Test3 | 2.40   | 3.46   | 5.78   | 4.06   | 1.53   | 7.69   | 1.57   | 8.16   |

Table S3. Coefficient of variation ( $CV$ ) for the eight sensors in the repeated concentration-only tests

| Sensor   | S1   | S2   | S3   | S4   | S5   | S6   | S7   | S8   |
|----------|------|------|------|------|------|------|------|------|
| $CV$ (%) | 1.36 | 1.74 | 1.60 | 1.21 | 6.41 | 7.37 | 3.94 | 4.04 |

Table S4. Sensor response time ( $t_{90}$ ) in the concentration-only tests

| BBCEAS concentration (ppb) | S1 (s) | S2 (s) | S3 (s) | S4 (s) |
|----------------------------|--------|--------|--------|--------|
| 17.2                       | 168    | 374    | 280    | 178    |
| 28.2                       | 243    | 364    | 308    | 317    |
| 33.7                       | 149    | 345    | 261    | 233    |
| 42.6                       | 234    | 421    | 318    | 318    |
| 52.1                       | 281    | 411    | 327    | 318    |
| 18.9                       | 178    | 364    | 252    | 131    |
| 26.7                       | 168    | 346    | 318    | 290    |
| 35.2                       | 243    | 411    | 337    | 309    |
| 42.5                       | 289    | 439    | 336    | 317    |
| 49.8                       | 317    | 402    | 327    | 327    |
| 17.8                       | 252    | 392    | 289    | 214    |
| 28.2                       | 187    | 421    | 309    | 262    |
| 33.3                       | 216    | 297    | 216    | 243    |
| 43.6                       | 306    | 387    | 324    | 270    |
| 53.9                       | 306    | 396    | 297    | 279    |
| 57.7                       | 333    | 396    | 315    | 306    |

Table S5.  $R^2$  and  $RMSE$  for the MLR model variable selection

| $R^2$ | C     | C+T   | C+T+RH | C+T+RH+intercept |
|-------|-------|-------|--------|------------------|
| group | 0.813 | 0.845 | 0.878  | 0.751            |
| S1    | 0.826 | 0.891 | 0.915  | 0.839            |
| S2    | 0.777 | 0.810 | 0.863  | 0.754            |
| S3    | 0.807 | 0.834 | 0.865  | 0.752            |
| S4    | 0.819 | 0.881 | 0.908  | 0.813            |
| S5    | 0.895 | 0.918 | 0.942  | 0.863            |
| S6    | 0.868 | 0.880 | 0.927  | 0.854            |
| S7    | 0.855 | 0.902 | 0.934  | 0.846            |
| S8    | 0.868 | 0.870 | 0.915  | 0.864            |

| $RMSE$ (ppb) | C     | C+T   | C+T+RH | C+T+RH+intercept |
|--------------|-------|-------|--------|------------------|
| group        | 11.85 | 12.57 | 13.28  | 13.32            |
| S1           | 10.81 | 12.21 | 12.67  | 12.82            |
| S2           | 10.30 | 11.16 | 12.42  | 12.61            |
| S3           | 4.12  | 6.46  | 8.35   | 9.16             |
| S4           | 9.94  | 11.53 | 12.15  | 12.19            |
| S5           | 11.06 | 11.71 | 12.32  | 12.41            |
| S6           | 18.80 | 18.89 | 19.26  | 19.26            |
| S7           | 14.56 | 15.31 | 15.81  | 15.81            |
| S8           | 14.04 | 14.08 | 14.85  | 15.21            |

Table S6. Variable coefficients of the MLR model

| Variables ignoring intercept  | Coefficients | <i>P</i> -value        | 95% CI           |
|-------------------------------|--------------|------------------------|------------------|
| Intercept                     | 0            | N/A                    | N/A              |
| C                             | 0.552        | $1.01 \times 10^{-31}$ | [0.485, 0.620]   |
| T                             | 0.399        | $3.06 \times 10^{-12}$ | [0.298, 0.501]   |
| RH                            | -0.142       | $1.02 \times 10^{-7}$  | [-0.191, -0.092] |
| Variables including intercept | Coefficients | <i>P</i> -value        | 95% CI           |
| Intercept                     | 2.953        | 0.188                  | [-1.465, 7.371]  |
| C                             | 0.536        | $1.62 \times 10^{-28}$ | [0.464, 0.607]   |
| T                             | 0.364        | $4.65 \times 10^{-9}$  | [0.250, 0.478]   |
| RH                            | -0.174       | $1.90 \times 10^{-6}$  | [-0.242, -0.105] |

Table S7. Preliminary cross-sensitivity tests

| Interferent gas     |    | CO                      | NO                     | NO <sub>2</sub>         | Isobutylene  |
|---------------------|----|-------------------------|------------------------|-------------------------|--------------|
| Concentration       |    | 39.7±0.53 ppm           | 100.5±0.20 ppb         | 83.1±0.19 ppb           | 100±0.00 ppb |
| Sensor signal (ppb) | S5 | 1.10±0.11               | 1.41±0.05              | 0.20±0.00               | 1.99±0.14    |
|                     | S6 | 0.58±0.06               | 0.99±0.05              | 0.20±0.00               | 1.23±0.08    |
|                     | S7 | 1.23±0.08               | 1.45±0.09              | 0.20±0.00               | 1.82±0.10    |
|                     | S8 | 1.56±0.12               | 1.30±0.10              | 0.20±0.00               | 1.61±0.04    |
| <i>P</i> -value     | S5 | $2.44 \times 10^{-116}$ | $2.73 \times 10^{-17}$ | $8.87 \times 10^{-125}$ | 0.876        |
|                     | S6 | $7.04 \times 10^{-143}$ | $4.84 \times 10^{-67}$ | $6.43 \times 10^{-176}$ | 0.294        |
|                     | S7 | $2.77 \times 10^{-100}$ | $1.83 \times 10^{-19}$ | $1.60 \times 10^{-124}$ | 0.193        |
|                     | S8 | $4.03 \times 10^{-5}$   | $3.30 \times 10^{-23}$ | $7.24 \times 10^{-124}$ | 0.064        |

Note that the average sensor signal of zero air (baseline) is 1.66±0.30 ppb.
